# Supplementary material for: Comparison of the roots of Salvia miltiorrhiza Bunge (Danshen) and its variety S. miltiorrhiza Bge f. Alba (Baihua Danshen) based on multi-wavelength HPLC-fingerprinting and contents of nine active components
Source: Royal Society of Chemistry journal article supplement (doi:10.1039/c6ay00185h), 2016-01-01
Supplement: c6ay00185h1.pdf [file c6ay00185h1.pdf]

**Table S1** The content of 9 compounds in samples (mg g<sup>-1</sup>, n = 2)

| NO.     | DSS    | CA     | RA     | LA     | SAB    | Dihy I | Crypto | Tan I  | Tan II <sub>A</sub> | NO.     | DSS    | CA     | RA     | LA     | SAB    | Dihy I | Crypto | Tan I  | Tan II <sub>A</sub> |
|---------|--------|--------|--------|--------|--------|--------|--------|--------|---------------------|---------|--------|--------|--------|--------|--------|--------|--------|--------|---------------------|
| ZHDS 1  | 0.127  | 0.107  | 1.296  | 0.563  | 38.236 | 0.189  | 1.428  | 0.351  | 2.627               | BHDS 21 | 0.4803 | 0.030  | 9.343  | 1.566  | 65.460 | 0.432  | 2.377  | 0.286  | 2.490               |
| ZHDS 2  | 0.238  | 0.021  | 3.213  | 1.533  | 51.480 | 0.685  | 3.912  | 0.561  | 3.486               | BHDS 22 | 0.3845 | 0.154  | 2.786  | 0.361  | 42.195 | 0.293  | 2.625  | 0.432  | 2.942               |
| ZHDS 3  | 0.309  | 0.019  | 1.518  | 1.748  | 36.069 | 0.521  | 3.196  | 0.763  | 4.295               | BHDS 23 | 0.2264 | 0.047  | 2.456  | 1.147  | 51.246 | 0.463  | 2.999  | 0.424  | 4.232               |
| ZHDS 4  | 0.142  | 0.043  | 0.894  | 0.629  | 39.471 | 0.224  | 3.303  | 0.494  | 3.921               | BHDS 24 | 0.2320 | 0.031  | 3.731  | 2.294  | 53.910 | 0.505  | 2.605  | 0.411  | 3.949               |
| ZHDS 5  | 0.183  | 0.029  | 2.299  | 1.461  | 62.677 | 0.246  | 2.342  | 0.463  | 2.817               | BHDS 25 | 0.2174 | 0.031  | 2.491  | 1.606  | 63.576 | 0.170  | 1.596  | 0.320  | 3.088               |
| ZHDS 6  | 0.158  | 0.024  | 1.202  | 1.127  | 40.292 | 0.609  | 4.768  | 0.894  | 3.979               | BHDS 26 | 0.5172 | 0.059  | 7.547  | 3.221  | 52.353 | 0.536  | 2.046  | 0.389  | 2.238               |
| ZHDS 7  | 0.434  | 0.086  | 2.073  | 0.598  | 54.789 | 0.291  | 2.524  | 0.657  | 4.225               | BHDS 27 | 0.3902 | 0.022  | 2.917  | 4.788  | 65.536 | 2.601  | 5.935  | 1.026  | 7.150               |
| ZHDS 8  | 0.436  | 0.019  | 1.589  | 2.308  | 37.777 | 0.539  | 2.307  | 0.538  | 2.925               | BHDS 28 | 0.1804 | 0.015  | 2.045  | 1.248  | 42.074 | 0.718  | 3.337  | 0.607  | 4.117               |
| ZHDS 9  | 0.204  | 0.029  | 1.368  | 2.053  | 35.524 | 0.475  | 2.008  | 0.449  | 2.431               | BHDS 29 | 0.2133 | 0.029  | 2.719  | 0.888  | 47.736 | 0.592  | 3.201  | 0.201  | 2.543               |
| ZHDS 10 | 0.359  | 0.064  | 4.188  | 1.973  | 52.272 | 0.732  | 0.702  | 0.972  | 2.855               | BHDS 30 | 0.3408 | 0.012  | 3.417  | 2.291  | 58.930 | 0.171  | 1.103  | 0.541  | 3.383               |
| ZHDS 11 | 0.420  | 0.024  | 2.289  | 2.015  | 51.699 | 0.538  | 2.639  | 0.864  | 4.673               | BHDS 31 | 0.7492 | 0.030  | 4.936  | 4.731  | 60.374 | 0.460  | 2.165  | 0.622  | 3.989               |
| ZHDS 12 | 0.268  | 0.043  | 1.780  | 1.876  | 56.369 | 0.933  | 4.370  | 1.274  | 6.356               | BHDS 32 | 0.9071 | 0.022  | 3.992  | 5.624  | 70.142 | 0.836  | 4.825  | 0.597  | 4.196               |
| ZHDS 13 | 0.482  | 0.030  | 2.569  | 3.249  | 51.023 | 0.904  | 3.249  | 1.326  | 6.401               | BHDS 33 | 0.3923 | 0.0673 | 3.067  | 1.786  | 53.334 | 0.532  | 3.822  | 0.222  | 3.160               |
| ZHDS 14 | 0.791  | 0.023  | 5.038  | 2.318  | 50.850 | 0.187  | 1.066  | 0.380  | 2.126               | BHDS 34 | 0.2474 | 0.038  | 1.777  | 0.980  | 38.787 | 0.566  | 2.506  | 0.457  | 2.958               |
| ZHDS 15 | 0.603  | 0.030  | 5.865  | 3.193  | 52.649 | 0.562  | 1.956  | 0.604  | 2.423               | BHDS35  | 0.4047 | 0.025  | 3.611  | 1.742  | 57.450 | 0.647  | 7.049  | 0.775  | 5.065               |
| ZHDS 16 | 0.330  | 0.029  | 2.011  | 1.427  | 57.088 | 0.566  | 3.634  | 0.437  | 3.638               | BHDS 36 | 0.2223 | 0.089  | 1.524  | 2.589  | 46.101 | 0.546  | 3.032  | 0.661  | 3.675               |
| ZHDS 17 | 0.565  | 0.070  | 6.441  | 2.532  | 58.439 | 0.671  | 2.671  | 0.303  | 2.133               | BHDS 37 | 1.096  | 0.059  | 1.122  | 2.580  | 40.664 | 1.342  | 3.792  | 1.400  | 5.730               |
| ZHDS 18 | 0.313  | 0.047  | 4.098  | 1.688  | 63.011 | 0.728  | 3.158  | 0.479  | 3.395               | BHDS 38 | 0.6938 | 0.073  | 6.507  | 1.881  | 62.600 | 0.468  | 2.865  | 0.283  | 1.783               |
| ZHDS 19 | 0.175  | 0.064  | 1.701  | 0.970  | 48.539 | 0.889  | 5.751  | 0.640  | 4.419               | BHDS 39 | 0.397  | 0.026  | 3.983  | 2.536  | 81.519 | 0.872  | 11.052 | 1.266  | 7.600               |
| ZHDS 20 | 0.251  | 0.024  | 1.795  | 1.497  | 52.012 | 0.554  | 4.082  | 0.717  | 4.238               | BHDS 40 | 0.3228 | 0.052  | 2.026  | 1.590  | 55.611 | 0.444  | 2.553  | 0.622  | 2.585               |
| Mean    | 0.339  | 0.0413 | 2.661  | 1.738  | 49.513 | 0.552  | 2.953  | 0.658  | 2.668               | Mean    | 0.431  | 0.046  | 3.600  | 2.272  | 55.480 | 0.660  | 3.574  | 0.577  | 3.844               |
| RSD (%) | 51.570 | 59.786 | 60.735 | 43.964 | 17.533 | 40.025 | 40.614 | 43.614 | 33.331              | RSD (%) | 58.114 | 72.075 | 57.901 | 60.915 | 19.774 | 79.472 | 63.007 | 56.679 | 40.165              |
